# Supplementary material for: A genomic region harboring the Pl1 allele from the Peruvian cultivar JC072A confers purple cob on Japanese flint corn (Zea mays L.)
Source: PubMed Central journal article supplement — Breed Sci. 2018 Nov 28;68(5):582–6. doi: 10.1270/jsbbs.18090 (PMC6345230; doi:10.1270/jsbbs.18090), 2018-11-28
Supplement: 68_18090_2.pdf [file 68_18090_2.pdf]

Supplemental Table 1. Maize markers for QTL mapping

| Name      | Bin  | Alias    | Forward primer 5' -> 3'     | Reverse primer 5' -> 3'   |
|-----------|------|----------|-----------------------------|---------------------------|
| umc1566   | 1.01 |          | ATCTCGTCTACCTAACCCACCCTC    | CAGGTGAAGAATCTGGTGAGGTC   |
| umc1292   | 1.00 |          | GAAGTGGGGAACATGGTTAATGTC    | TCACGGTTCAGACAGATACAGCTC  |
| umc1106   | 1.00 |          | CATCCAGTCATCGGTAATACGACA    | AACTGTTGCCTTCTTTTTCCCTTC  |
| bmc1014   | 1.01 | bnlg1014 | CACGCTGTTTCAGACAGGAA        | CGCCTGTGATTGCACTACAC      |
| bmc1627   | 1.02 | bnlg1627 | CGGACGGGGTTATTTAAAAT        | TGTGTTTCGAGAATCTCTCG      |
| umc2397   | 1.03 |          | CGCATATATACTTGTGCGCACTTT    | TATGTATGTTTCGTGTGCCTGTGTG |
| bmc1866   | 1.03 | bnlg1866 | CCCAGCGCATGTCAACTCT         | CCCCGGTAATTCAGTGGATA      |
| bmc2238   | 1.04 | bnlg2238 | TGCCACTCAAGCCTTCTTTT        | TTCTGATTGCAGTGCAGACC      |
| umc2227   | 1.04 |          | ACCTTGAGCGTGGAGTCGGT        | AGCTGAGCCTTCTCTTCTGGCT    |
| umc1144   | 1.04 |          | ATGGCCCACTCATATATCTCTGT     | TGTGTTGATTAGCAGCGGATAAAA  |
| umc1452   | 1.03 |          | GATCCTAGCCTTGAAGGGGA        | AAGAGGAACCATCTGCTATCGTG   |
| umc1035   | 1.06 |          | CTGGCATGATCACGCTATGTATG     | TAACATCAGCAGGTTTGCTCATT   |
| umc1122   | 1.06 |          | CACAACTCCATCAGAGGACAGAGA    | CTGCTACGACATACGCAAGGC     |
| bmc1025   | 1.07 | bnlg1025 | TGGTGAAGGGGAAGATGAAG        | CCGAGACGTGACTCCTAAGC      |
| umc1128   | 1.07 |          | TCAATTTGAGCTATCACTTCCG      | ATTGGTTCATTGGTTTTGTTGAT   |
| umc1991   | 1.08 |          | GAAATTGATGCAATTCACCCTGAT    | ATTGAATTGCGTGATGCAAGAGTA  |
| umc1306   | 1.09 |          | CGAAACAAAACACCCAGCAGTAGT    | CCAGGATGAATAAATCGTATTGCC  |
| umc2149   | 1.10 |          | TACATGCAAAGCTAGCTAGTCGGA    | AGCAGCACCATCGTAATAAGCAC   |
| umc2241   | 1.11 |          | CGTGATCGACATGGACCACTT       | CACCATCACATTCACACGCATAG   |
| umc1744   | 1.11 |          | ATGAAGCTGGCTGATACGGAAT      | CGAGCCCTTAATTAGTTCTCGGTT  |
| umc2246   | 2.00 |          | AGGCTCCAGCTCTAGGGGAGT       | GTGAACTGTGTAGCGTGGAGTTGT  |
| bmc1017   | 2.02 | bnlg1017 | ATTGGAAGGATCTGCGTGAC        | CAGCTGGTGGACTGCATCTA      |
| umc2403   | 2.02 |          | AGTCAGTCGATCGTACACAGTCCA    | TTCGTATCTTAGCTGGTCTTTGGC  |
| umc1823   | 2.02 |          | AAAGCCTTACTGTTATTAGGCTAGGCA | AGAAAACCAGCCCAGATGTTT     |
| ZAG125    | 2.02 | bnlg125  | GGGACAAAAGAAGAAGCAGAG       | GAAATGGGACAGAGACAGACAAT   |
| ZCA381    | 2.04 | bnlg381  | TCCCTCTGAGTGTTATCACAAA      | GTTTCCATGGGCAGGTGTAT      |
| umc2247   | 2.04 |          | TTAAACTGGGCCCATAAAGTTCT     | GAAGGATGAGCAAAGGAAGATGAA  |
| phi083    | 2.04 | prp2     | CAAACATCAGCCAGAGACAAGGAC    | ATTCATCGACGCGTCACAGTCTACT |
| umc2110   | 2.05 |          | CTGCGTACTCTAGGTATCCCGTGT    | GGTCGGATAGGAGAATCTACAGGC  |
| umc2205   | 2.07 |          | ATGGTGAGCGAGTGAAAGAGAGAT    | CATGATCATTGGCGATGGTAAT    |
| umc1042   | 2.07 |          | AAGGCACTGCTACTCCTATGGCTA    | CTGACCTTTGAATTCTGTGCTCCT  |
| bmc1233   | 2.08 | bnlg1233 | GAACACCAGAGGAGAGTGGG        | TTCATTGTCCACCACTGGA       |
| bmc1662   | 2.08 | bnlg1662 | GCACCCACATGAAGTATCCC        | TTGTTTTGTCAGTGCCTCAG      |
| bmc1721   | 2.08 | bnlg1721 | ACGACTTTCATGCCTCGTCT        | ATTTCTTTTGCCACCTCAGC      |
| umc1798   | 2.08 |          | TATAACAACGTAGCAAAGCACGGG    | GATCGACCCTAATCGTCCTCCTAC  |
| bmc1940   | 2.08 | bnlg1940 | CCTTTGTTTCAGGCCGTTA         | CAGCAGCCTGATGATGAACA      |
| umc2184   | 2.09 |          | CTTGGCCTACTCCAAGTTCTCG      | AGTAGAGCAGCACCATCCCCG     |
| phi101049 | 2.10 |          | CCGGGAACCTGTTTCATCG         | CCACGTCCATGATCACACC       |
| umc2214   | 2.10 |          | ACCCCTGATTCTCTTACGTTT       | CTGGATGAGGAGGAAGAATACGAG  |
| umc1394   | 3.01 |          | CCCGAGTCAGAAAAACATCACTT     | CCTAACCTGAAGAAGGGAGGTCAT  |
| umc2376   | 3.01 |          | CATTTGTTCTCGCATCCTTTC       | ATCTCCCCTGTCATCTAACCCAC   |
| bmc1144   | 3.02 | bnlg1144 | TACTCGTGTGTGGCGTTAG         | AGCCGAGGCTATCTAACGGT      |
| mmc0132   | 3.04 |          | ATATTCATCGGTTCAACTTCC       | AGCGCCAGCCTCCCGTAGTC      |
| umc2002   | 3.04 |          | TGACCTCAACTCAGAATGCTGTTG    | CACAAAATCCTCGAGTCTTGATTG  |
| umc1307   | 3.05 |          | GTACGGGTGAAGAGAACAGGTCAA    | ATCTTCTGTTTTTGGTCCCTTCC   |
| umc1539   | 3.05 |          | GAGTCCAGGCAGCACGCTAGT       | GAGCAGCACACGAGGACCAG      |
| phi102228 | 3.06 |          | ATTCCGACGCAATCAACA          | TTCATCTCCTCCAGGAGCCTT     |
| ZCT197    | 3.06 | bnlg197  | GCGAGAAGAAAGCGAGCAGA        | CGCCAAGAAGAAACACATCACA    |
| umc2050   | 3.07 |          | CTCCTGCTGTGATTCTAGGACGA     | CTGGATCTCGGCATGGTCTT      |
| umc1320   | 3.08 |          | TGCGAAATCTGTATACCATAGGCA    | CTCTTTTAGCAGTGTGCCGAATTT  |
| umc2174   | 3.08 |          | GTACGTACGCAGCCACTTGTGAC     | ACATAAATAAAACGTGTGCCGAC   |

|           |      |          |                              |              |                              |
|-----------|------|----------|------------------------------|--------------|------------------------------|
| umc2008   | 3.09 |          | GTGGACTACTCTCGCTTCGCTTT      | CGTGGACGTA   | CGTGGACTACTCGATTAGTTTGGT     |
| umc1682   | 4.01 | bx2      | AGCAAGCAAGCAAGTCACTGAGTA     | GAGCTAGCCG   | GAGCTAGCCGGAGATAGAGAGGAG     |
| phi021    | 4.03 | adh2     | TTCCATTCTCGTGTCTTGGAGTGGTCCA | CTTGATCACCTT | CTTGATCACCTTCTCTGCTGTCGCCA   |
| umc2281   | 4.03 |          | CAATGATTGGAGCCTAACCCT        | ATGATGATCTG  | ATGATGATCTGCAGAGCCTAGTCC     |
| umc1969   | 4.05 |          | CTCGAGCCCAGCAGAGAAAG         | GGTGGAGCCC   | GGTGGAGCCCATGGCTATTACTAT     |
| umc1775   | 4.07 |          | GAGGACAACGCTGCTATTCTCG       | GGA          | GGA                          |
| bmc2162   | 4.08 | bnlg2162 | GTCTGCTGCTAGTGGTGGTG         | CACCGGCATT   | CACCGGCATTGATATCTTT          |
| umc1999   | 4.09 |          | GTCCCATCTGCTGAGGGCTTAT       | ACAACAAAT    | ACAACAAATGGGATCTCCGTTACA     |
| ZAG589    | 4.10 | bnlg589  | GGGTCGTTTAGGGAGGCACCTTTGGT   | GCGACAGAC    | GCGACAGACAGACAGACAAGCGCATTGT |
| umc1716   | 4.11 |          | ACCACCAGCTACCAGGGATGT        | CTGCTGGAT    | CTGCTGGATCTGCTCGTACTTGT      |
| umc1260   | 5.00 |          | CTTAAGCAGAGCTCAAAA           | TAAATTGT     | TAAATTGTCAAGCGAGGTTTGGAT     |
| umc1478   | 5.01 |          | GAAGCTTCTCCTCTCGCGTCTC       | CAGTCCCAG    | CAGTCCCAGACCCTAGCTCAGTC      |
| umc1766   | 5.01 |          | ACAAGAAGGAATCGAGAGCAAATG     | CTTCGGGAT    | CTTCGGGATGGAGTCGTAGTTC       |
| umc2161   | 5.03 | mmp58    | ACGGCACACAGATATTTCA          | AAGATCAG     | AAGATCAGATTTGCTTGTGGGTG      |
| umc1110   | 5.03 |          | TTACACCAAGGTCCGAAACAAGAT     | TCTTGGA      | TCTTGGAAGGCAAGACTCTACCTG     |
| mmc0081   | 5.05 |          | TGAAATAATTCACAGCACTCC        | TGATAGC      | TGATAGCACAACACAGCTATG        |
| umc1019   | 5.06 | umc126a  | CCAGCCATGTCTTCTCGTTCTT       | AAACAAAG     | AAACAAAGCACCATCAATTCGG       |
| mmc0481   | 5.06 |          | GCACCTGCGAGACTAGG            | TGTTTGAG     | TGTTTGAGCCGTTCTAGACT         |
| phi085    | 5.06 | gln4     | AGCAGAACGGCAAGGGCTACT        | TTTGGC       | TTTGGCACCACGACGA             |
| ZCT118    | 5.07 | bnlg118  | CTTCCAGCCGCAACCCTC           | CCAACA       | CCAACAACGCGGACGTGA           |
| umc1829   | 5.09 |          | GTTGATTGGTTGATGTGGA          | CAGTTTG      | CAGTTTGATGTTTATGGCTCTCTC     |
| ZAG238    | 6.00 | bnlg238  | CTTATTGCTTTTCGTCATACACACATTC | GAGCATG      | GAGCATGAGCTTGCATATTTCTTGTGG  |
| umc1002   | 6.00 | fdx2     | AGCTAGCTATACACC              | TCAGTTT      | TCAGTTTGGAAACAGGGAAAAGTA     |
| umc1018   | 6.00 | gpc2     | GAACGGATATTGGAACCTGTGC       | GTGCAC       | GTGCACGGTGTCTACTTGAAC        |
| bmc1433   | 6.01 | bnlg1433 | CTCAGTCCCTCCCATTTTGA         | TTCTGG       | TTCTGGCTCAAAGGGCTAGA         |
| bmc1422   | 6.01 | bnlg1422 | GACGATTAACAGGTGGGGAC         | ATGATG       | ATGATGCAAATGAGGCACAA         |
| umc1656   | 6.02 |          | AGTTTTGACCGCGCAAAAGTTA       | GTACG        | GTACGAGCAGGCCATTAACCC        |
| umc1006   | 6.02 |          | AATCGCTTACTTGTAACCCACTTG     | AGTTT        | AGTTTCCGAGCTGCTTTCTCT        |
| bmc2191   | 6.02 | bnlg2191 | CACACAATCCCCACAAAAA          | CGAAAC       | CGAAACATCCAGGAAACTGC         |
| AC192572  | 6.01 |          | ATGGGCATGGCGATGATTGA         | GTAGA        | GTAGAAGCCCGCTCTCTTCC         |
| Z3559     | 6.02 |          | CGGCGCTATCCTACTGGTTT         | GGCTG        | GGCTGGAATATCACGAGCGA         |
| Z3663     | 6.02 |          | AGATGAGCTGAACCTGCACC         | TACACT       | TACACTGCGGCACTGTAAGG         |
| npi393    | 6.03 |          | CTGCAGCTCATGGATGCTGGCTCT     | GTCCG        | GTCCGTGGTCTTCTCTCTCCCGGCC    |
| umc1796   | 6.04 |          | CGCTGAGGCTTAAGATGGTGT        | AACGC        | AACGCCTTACGAGCACGAAC         |
| Z4325     | 6.04 |          | TGCAAGACATGGCTGCCATA         | CCTCT        | CCTCTCCAATCTCCATCGGC         |
| umc2610   | 6.04 |          | AGTCGATCATGATTGTGCATCCT      | AGTG         | AGTGCCCTTCTCTCAAGCCTAAC      |
| umc1857   | 6.04 |          | TTCCTTGCCAAACAATAACAAGGAT    | GTTCA        | GTTCAATTGCTTCTCTTGGAACT      |
| bmc1617   | 6.04 | bnlg1617 | CGTGCACGGTACAGAAAGAA         | AGAA         | AGAAAGCCACGTACCCTTT          |
| AC205395  | 6.05 |          | CACCATCTCAGTCGGCAACT         | GGGT         | GGGTGGCTCCTATTGTGCT          |
| umc2319   | 6.04 |          | GCTCTACTAGCCTCGATTCC         | GATCC        | GATCCACGCGAGGTTCACTG         |
| umc1805   | 6.05 |          | AGTGCACCAGCTTTAATCACCTC      | TGTG         | TGTGACCTGTGTGGTCTGTGG        |
| bmc1702   | 6.05 | bnlg1702 | TTATCATCAAATGGAGGACACG       | AAAG         | AAAGACACAGCTAATGGGC          |
| mmc0241   | 6.05 |          | TATATCCGTGCATTTACGTTT        | CATCG        | CATCGCTTGTCTGTGCGA           |
| ZCT345    | 6.05 | bnlg345  | CGAAGCTAGATGTAGAAA           | CTTAC        | CTTACCAACCAACTCCCAT          |
| umc1859   | 6.06 |          | ATATACATGTGAGCTGGTTGCCCT     | GATG         | GATGCTATTACCAATCTCCAGGT      |
| umc2162   | 6.06 |          | GATGCTGATGACGCTCTACAAGG      | GACG         | GACGATGACGAACCCGAGC          |
| phi299852 | 6.07 |          | GATGTGGGTGCTACGAGCC          | AGAT         | AGATCTCGGAGCTCGGCTA          |
| bnlg1136  | 6.07 |          | TAACCGGATGAGCATCTTCC         | CATC         | CATCAGCTTCAACGAGTTCCG        |
| umc1653   | 6.07 |          | GAGACATGGCAGACTCACTGACA      | GCCG         | GCCGCCCACGTACATCTATC         |
| bmc2132   | 7.00 | bnlg2132 | GGCGAGAGAGGCAAAGTTAA         | GTCG         | GTCGCACAAGGGGATCAC           |
| umc1409   | 7.01 |          | GCTAGTAGACATCGACGGATCGAC     | ATG          | ATGACGTCCAGGAGGATGACC        |
| umc2392   | 7.01 |          | CAGAGACCTCGACTTCGACCAC       | CTT          | CTTCTGCTTCTGCTCGACCTTCT      |
| umc1213   | 7.02 | in1      | CACGCTCGATCACTGAAGCAT        | GTAC         | GTACGTCCACCCCGTGTCT          |

|         |       |          |                             |                               |
|---------|-------|----------|-----------------------------|-------------------------------|
| umc1666 | 7.02  |          | TTATTGCCCTCCCTGTTCTTGTT     | ACCTTGACGCAGCAATCCTC          |
| mmc0411 | 7.02  |          | CGATGCAAGAGTGTCAAGTA        | ACTCCCTAGTGCAAAAATCA          |
| ZCT155  | 7.03  | bnlg155  | ACCGAGTAGCCGAGACACG         | AGAGTCCTGGAGCCACATGAG         |
| bmc1666 | 7.04  | bnlg1666 | GCTGGTAGCTTTTCAGATGGC       | TGTCCTCCTCCAGTTTCAC           |
| umc1029 | 7.04  |          | AACACCTGCTGGATATGGATCACT    | GGAAGAAAAATGTGACCTGCTC        |
| umc1782 | 7.04  | rip2     | CGTCAACTACCTGGCGAAGAA       | TCGCATACCATGATCACTAGCTTC      |
| umc1412 | 7.04  |          | GCATCTGTAGCCTTTTTGTGTGTG    | CTCAGCTTGCAGGTTATCGCTT        |
| umc2222 | 7.05  |          | CCAACAACCTTGCTACCATAGTCC    | TACATGGTCCTGTGACAACTTGC       |
| umc1760 | 7.05  |          | CATGTGGGTGTTAATAAGCAAGGG    | GCCTTGTTTGCTCTCTGAAACAAT      |
| umc1327 | 8.01  |          | AGGGTTTTGCTCTTGAATCTCTC     | GAGGAAGGAGGAGGTTCGTATCGT      |
| umc1741 | 8.03  |          | AGACGAACCCACCATCATCTTTC     | CGCTTGCGATCTCCATGTATATCT      |
| bmc1812 | 8.05  | bnlg1812 | CGAGAAGACTTTCGTGAACA        | TTACGTGCGTCGTGAGAATC          |
| umc2395 | 8.06  |          | ATCACATCTTTCGTTGTCATTTTG    | ATGGATTCTTCCGGCCTCTC          |
| bmc1823 | 8.07  | bnlg1823 | TGTGACTCCATACCGCACAT        | CTCATCATGTTGTACATGGCG         |
| bmc1828 | 8.07  | bnlg1828 | TTGTGTACGATGCGATCGAT        | ACAACGGACAGGAACAGGAC          |
| umc1663 | 8.08  |          | GCTTGCACTAGCTTTAGCTCCATC    | CGGGATCAGTCGTTACAAACATAG      |
| bmc1724 | 9.01  | bnlg1724 | CTGACCCAGAGCATTGTGAA        | GATGAAGAGCTTGCAGTCCC          |
| dupssr6 | 9.02  |          | GATCCTACCAAAATCTTATAGGC     | ACAGCTAGCCAAGATCTGATT         |
| umc1636 | 9.02  | omt2     | CATATCAGTCGTTTCGTCAGCTAa    | GTAAGGTCAGGTCGTCGCTCTT        |
| umc1037 | 9.02  |          | GTGCGCGATTCTTAGTTTGC        | CTTCTTCGTAAAGGCATTTTGTGC      |
| umc2398 | 9.04  |          | TCTAATACATAGCAGCCCTCGCTC    | CACACGTTACAAGGAGCAAGAAGA      |
| umc1492 | 9.04  |          | GAGACCCAACCAAACTAATAATCTCTT | CTGCTGCAGACCATTTGAAATAAC      |
| umc1519 | 9.04  |          | CTCGAGACTCTGGTTCAATCCAAT    | CATGCACGTAATCCCTGATTTTT       |
| umc2371 | 9.05  |          | GATTATTTGATTAGCCCGGTTGGT    | CTGAGTCGTATTTATAGAGCCCGC      |
| umc1789 | 9.06  |          | ACCTCTCCTTTTTCTCGCCTT       | GTCAGAGAAGAGGCCGGGTC          |
| ZCT619  | 9.07  | bnlg619  | ACCCATCCCCTTTCCACCTCCTCCT   | GCTTTTCAGCGAATACTGAATAACGCGGA |
| umc1318 | 10.01 |          | ACTTCGTCTAGTGTCCCTCCGTT     | TGCCAGATTAAGCAACACAAGA        |
| umc1432 | 10.02 |          | GGCCATGATACAGCAAGAAATGAT    | TACTAGATGATGACTGACCCAGCG      |
| umc1785 | 10.03 |          | TTCAATCCGTAGTCTGGTGCTAT     | CAATAATTTCTTTCGCTTGTTCG       |
| ZAG210  | 10.03 | bnlg210  | GCCTCGCACCAAGACATAATA       | TGCCCCATTTGAGTAGACTTC         |
| bmc1716 | 10.03 | bnlg1716 | AAATAACCAGAACATGCCGC        | CGCAACTTTCATCGAGTTGA          |
| umc2016 | 10.03 | pao1     | AGAGACGACATGTCTATCCTTGCC    | ATTGCATTGCATTCAGCTGTTGT       |
| bmc1655 | 10.03 | bnlg1655 | ATTAAAATCTTGTGATGGCG        | TTCTGTTCCCGCCTGTAATT          |
| umc1077 | 10.04 |          | CAGCCACAGTGAGGCACATC        | CAGAGACTCTCCATTATCCCTCCA      |
| umc2163 | 10.04 | mmp121   | AAGCGGGAATCTGAATCTTTGTTT    | GAAATTGCTGGGGTCTCATTCTT       |
| umc1053 | 10.04 | incw3    | CTTGATCATCAGCTAGGGCATGT     | TCAACTTATGTCAACTGCATGCTT      |
| umc2350 | 10.04 |          | AGTAGCGACTCCTCTGCGTGAG      | CGAATCGAGGATGGTTTGTTTTT       |
| ZAG594  | 10.06 | bnlg594  | CGAGCGCTTTGCGAGTACCAGTACACA | CTGCGTGCGTCCAGCCTCCACT        |
| umc2122 | 10.06 | tip5     | TTGACAAGCTAGTGTGCAACTGTG    | TGAAAGCCCACTGGACAACTAAT       |
| bmc2190 | 10.06 | bnlg2190 | TCCTCCTTCATCCCCTTCTT        | CCCAGTATCATTGCCCAATC          |
| umc1084 | 10.07 |          | GATAAAAAGGCAAGTGCAACAAGG    | ATATCAACCAGAGGCTGGAACCTG      |
| bmc1518 | 10.04 | bnlg1518 | AGCTGTACACGCAGTAGGCA        | GGCTCTGTTAATTCGATCGC          |
| umc1344 | 10.07 | crr2     | GCGCTCTGACTTAATTAGAGGAGTTG  | GGCAGCAGATCTATGTCCAAGAAG      |

Supplemental Table 2. Primers for analysis of the *Pl1* gene

| Primer        | Objective                     | Primer sequence (5' -> 3') |
|---------------|-------------------------------|----------------------------|
| pl1myb_s_86   | Cloning, sequencing           | ATGGGCAGGAGGGCGTGCTGCG     |
| pl1myb_as_87  | Cloning, sequencing           | CTACACAAGCTGCTCGGCCGTGTG   |
| pl1_389-s     | Sequencing, fragment analysis | AGCAGCCATCTGCTACGAAT       |
| pl1_34-s      | Sequencing                    | CCGAACAGACAATGAAATCAAG     |
| pl1myb_696-s  | Sequencing                    | CGCCCGGCTCCGCAGCAGT        |
| pl1_355-s     | Sequencing                    | TGGTGGAGGAGGAGAAGCAC       |
| pl1myb_361-as | Sequencing                    | GCCGAGGAGCTTGTGGAGCCGG     |
| pl1_720-as    | Sequencing, fragment analysis | CGAGGTCCGCGCGAGGAGCGGC     |
| pl1_407-as    | Sequencing                    | GCTTCCTACGAGGGGAGATAC      |
| pl1_495-as    | Sequencing                    | GTCGGACTCGAGAAACGATG       |
